# Supplementary material for: Biological control potential of entomopathogenic fungal strains against peach Fruit fly, Bactrocera zonata (Saunders) (Diptera: Tephritidae)
Source: PeerJ. 2022 Apr 22;10:e13316. doi: 10.7717/peerj.13316 (PMC9037124; doi:10.7717/peerj.13316)
Supplement: Data S1 [file peerj-10-13316-s001.xlsx]

## Sheet: Sheet1
Larvae
Treatments	1×106	1×107	1×108	1×109	1×1010	Control
M.anisopoliae	38.43	43.5	49.71	57.67	65.33	0.5
B. bassiana	48.41	54.57	59.51	61.21	68.67	0.4
V. lecanii	41.43	47.75	51.56	58.76	61.31	0.8
Pupae
Treatments	1×106	1×107	1×108	1×109	1×1010	Control
M.anisopoliae	51.43	53.67	59.33	75.53	85.76	1.03
B. bassiana	54.51	63.33	70.56	74.67	89.67	1.6
V. lecanii	45.34	49.88	55.67	59.34	68.67	0.98
Adult
Treatments	1×106	1×107	1×108	1×109	1×1010	Control
M.anisopoliae	42.32	48.56	61.67	69.43	86.89	0
B. bassiana	45.76	54.56	59.34	72.75	84.34	0
V. lecanii	39.67	47.54	55.67	62.43	74.89	0.76
