# Supplementary material for: Biological control potential of entomopathogenic fungal strains against peach Fruit fly, Bactrocera zonata (Saunders) (Diptera: Tephritidae)
Source: PeerJ. 2022 Apr 22;10:e13316. doi: 10.7717/peerj.13316 (PMC9037124; doi:10.7717/peerj.13316)
Supplement: Data S2 [file peerj-10-13316-s002.xlsx]

## Sheet: Sheet1
Larval Stage		Metarhizium anisopliae			Beauveria bassiana			Verticillium lecanii					Pupal Stage		Metarhizium anisopliae			Beauveria bassiana			Verticillium lecanii					Adult Stage		Metarhizium anisopliae			Beauveria bassiana			Verticillium lecanii
Treatment	Replications	2 days	3days	6dys	2 days	3days	6dys	2days	3days	6dys			Treatment	Replications	2 days	3 days	6 dys	2 th days	3days	6 dys	2 days	3days	6dys			Treatment	Replications	2 days	3days	6dys	2 days	3days	6dys	2days	3days	6 dys
1	1	2	5	6	0	4	7	3	5	5			1	1	0	3	4	0	4	8	0	3	3			1	1	14	20	28	17	28	35	19	32	45
	2	3	4	7	2	5	6	1	4	6				2	1	4	6	2	6	6	1	4	6				2	12	16	22	16	23	34	18	36	44
	3	2	3	8	2	5	8	2	6	6				3	2	2	7	3	5	7	3	4	7				3	13	18	25	18	25	26	20	33	39
	4	2	5	6	2	6	7	2	6	5				4	2	4	6	2	7	8	1	2	5				4	10	17	21	15	27	30	17	32	39
	5	3	8	7	4	5	8	3	5	7				5	3	6	8	5	8	7	2	3	7				5	12	20	26	16	26	32	16	31	38
2	1	2	5	6	2	7	8	1	5	8			2	1	0	2	4	2	4	7	1	4	5			2	1	15	16	21	18	26	32	18	32	45
	2	1	3	7	0	6	6	2	7	5				2	2	3	7	4	6	5	2	5	3				2	11	17	25	16	25	35	17	33	47
	3	3	2	8	2	7	7	1	3	9				3	1	1	6	3	7	9	1	2	2				3	14	18	27	15	28	36	16	29	43
	4	0	3	5	1	6	8	2	4	7				4	0	2	2	2	4	7	1	4	6				4	12	16	22	14	26	34	20	30	45
	5	4	6	9	2	4	9	3	6	9				5	3	5	3	1	3	9	2	4	8				5	11	19	24	17	25	35	18	31	44
3	1	0	4	5	0	4	7	3	5	5			3	1	0	3	5	0	4	6	0	3	4			3	1	11	16	29	17	22	36	18	31	46
	2	2	3	7	2	5	6	1	4	6				2	1	1	6	3	6	5	1	4	5				2	14	20	26	15	27	35	20	32	45
	3	2	5	8	4	3	8	2	6	8				3	2	4	4	2	8	9	1	3	7				3	13	21	29	14	26	35	20	30	44
	4	1	4	6	2	4	7	2	6	9				4	2	3	3	3	7	8	2	6	6				4	11	17	27	18	28	34	19	31	45
	5	3	6	7	3	8	9	3	5	7				5	4	7	6	5	3	7	3	4	5				5	15	19	24	17	25	36	17	32	43
4	1	2	5	6	3	2	5	1	6	7			4	1	0	4	4	0	5	8	0	3	2			4	1	16	16	22	18	22	35	17	36	47
	2	0	4	7	1	5	8	2	4	6				2	3	3	5	3	5	7	1	4	5				2	15	19	26	16	25	34	18	26	46
	3	1	3	5	2	7	9	0	6	8				3	1	3	6	4	6	9	1	6	6				3	12	20	27	15	24	32	17	32	44
	4	2	5	6	2	6	8	3	6	8				4	2	6	7	5	7	6	2	5	3				4	15	16	29	15	27	35	17	31	45
	5	3	8	9	5	7	9	2	5	8				5	4	4	6	4	6	9	2	2	7				5	13	19	24	14	24	36	19	30	44
5	1	2	5	4	1	4	7	2	4	6			5	1	0	3	2	0	6	6	0	3	3			5	1	15	19	28	10	25	35	18	30	44
	2	2	4	7	3	5	8	1	4	6				2	1	4	5	3	5	8	1	4	2				2	11	18	27	16	26	35	17	32	42
	3	2	2	8	2	5	8	0	6	7				3	3	1	4	4	7	5	2	4	6				3	16	20	26	17	28	33	18	33	47
	4	2	5	6	3	7	9	2	8	7				4	4	4	3	6	6	8	4	2	6				4	13	16	25	15	29	36	19	31	45
	5	4	6	8	2	8	9	4	6	8				5	4	6	5	3	8	9	3	7	5				5	14	19	29	16	28	35	18	31	46
